# Supplementary material for: Exploring the provenance of information across Canadian hydrometric stations: Implications for discharge estimation and uncertainty quantification
Source: Copernicus journal article supplement (doi:10.5194/hess-2023-150), 2023-08-01
Supplement: Supplementary file [file hess-2023-150-AC2-supplement.pdf]

**Cover letter,**

Dear Editor,

Thank you immensely for handling our manuscript submission at HESSD. We greatly value the comments received by experts in the field.

Following is our initial response to the reviewers. A more comprehensive reply, coupled with the manuscript revision, will follow the open discussion phase after your decision.

Both reviewers highlighted the length of the manuscript. While we do our best to address this concern, considering the necessity to elucidate the Canadian hydrometric network, terminologies, and fundamental scientific concepts, a significant reduction in manuscript length might be challenging. We intend to either remove or relocate Figures or Tables that aren't directly aligned with the manuscript's overarching narrative and their related text. However, we'll retain fundamental elements to ensure the message remains accessible to a broader audience that might not have a grounding in discharge estimation methods' basics.

Once again, we thank the editor and reviewers for their engagement in the discussion phase within HESSD.

With kind regards,

Shervan Gharari, on behalf of co-authors, Paul Whitfield, Al Pietroniro, Jim Freer, Hongli Liu, Martyn P. Clark

## Answer to Gemma Coxon, reviewer #1:

We express our gratitude to the reviewer for providing constructive feedback on our manuscript. Your insightful comments have been instrumental in enhancing the quality of our work.

In our overall response to the reviewers' suggestions regarding relocating parts of the primary explanation to the appendix, we will attempt to do so for figures that might not significantly enhance or detract from the overall understanding (for example, Figures 9, 16, 18, and 19). We might also merge the information in Figures 16 and 17 into one Figure. However, it's crucial to note that not all readers are familiar with rating curves, and their concepts (such as 'shift', a topic mentioned in only a handful of studies, 'temporary shift', etc). We believe these concepts are very interconnected and removing these explanations might hamper non-expert readers' comprehension of the presented study.

This paper details the Water Survey of Canada's standard operating procedures in estimating discharge values from stage values. The paper addresses an important issue that is often not documented and has critical impacts on uncertainties in discharge time series. Generally the paper is well written and the figures are well presented, with lots of interesting examples of different types of rating curves. However, the paper is long with a lot of figures and as a result, the key message of the paper gets lost. I recommend shortening the paper (moving more material to supplementary information) and better clarifying the key aims and messages of the paper in the introduction, conclusions and abstract.

Considering the manuscript's length, our foremost goal was to ensure that hydrologists, especially those less acquainted with streamflow data production methods, could comprehensively understand the complexities involved. Oftentimes, papers only mention the use of a rating curve to calculate discharges from observed stages. However, this oversimplified view may not sufficiently contextualize the practices we aim to convey in our manuscript, particularly when establishing terminologies and regional contexts. We've noted this discrepancy while presenting our work to diverse audiences from various backgrounds. For instance, modelers, who are not from engineering or natural science backgrounds, may possess limited knowledge of discharge estimation processes while fitting and comparing different machine learning models.

To tackle the length issue, we are considering a restructuring of the paper. Potentially, relocating a series of examples to an appendix or a new section would better enable readers to navigate the core sections while opting to explore these examples as needed. This reorganization aims to enhance the manuscript's readability and offer a more focused reading experience.

For example, we would eliminate or move to the appendix Table-1 and 2, Figure-9, 16, 18, and 19.

Abstract – I don't think the abstract is a clear summary of the work that has been conducted and the key messages of the paper. I would recommend revising it to better synthesise the outcomes from the paper.

We thank the reviewer for their comment. We try to emphasize the scientific relevance of this work on residuals and reproducibility first in general and then report the specific findings of this study regarding the station of WSC. We have tried to convey these major points:

- 1- Terminologies and concepts for a broader audience.
- 2- Processes of “override” and “temporary shift” in the context of general information.
- 3- Python workflow to explore and label the period with “override” and “temporary shift”.
- 4- Impact of override and temporary shift; impact on residuals, etc. And the need for new approaches to identity.

**Old abstract:** Accurate discharge values play a critical role in water resource planning and management. However, it is common for users, modelers, and decision-makers to consider these values as true and deterministic, despite the subjective and uncertain nature of the estimation process. To address the issue, this study was conducted to identify the discharge estimation methods and associated uncertainties of hydrometric measurements in Canada. The study involved an exploration of multiple operating procedures for rating curve construction and discharge estimation across 1800 active Water Survey of Canada (WSC) hydrometric stations using an independent workflow. The first step involved understanding the discharge estimation process used by the WSC and the standard operating procedures (SOP) for inferring discharge from stage measurements. During the implementation of the workflow, it was observed that manual intervention and interpretation by hydrographers were required for time-series sequences labeled as “override” and/or “temporary shift”. The workflow demonstrated that 67 % of existing records could be adequately recreated following the rating curve and temporary shift concept, while 33 % followed the other discharge estimation methods (override). Novel methods for discharge uncertainty estimation should be sought given the practices of override and temporary shift by the WSC. This study attempts to reconcile the significant issue of estimating uncertainty in published discharge values, particularly in the context of open science and Earth System modeling. By collaborating with the WSC, this research aims to improve the understanding of the processes used for discharge estimation and promote wider access to metadata and measurements for more accurate uncertainty quantification.

**New abstract:** Accurate determination of discharge values forms the bedrock for effective water resource planning and management. Unfortunately, these data are frequently perceived as absolute and deterministic by users, modelers, and decision-makers, despite the inherent subjectivity and uncertainty in the data preparation processes. This study is undertaken to examine the discharge estimation methods utilized by the Water Survey of Canada (WSC) and their impacts on reported discharge values. Firstly, we elucidate the hydrometric station network, essential terminologies, and fundamental concepts of rating curves. Subsequently, we delve into WSC's standard operating procedures (SOPs), including shift, temporary shift, and override in discharge estimation. Based on WSC's records of 1800 active hydrometric stations, we evaluate sample rating curves and their correlation to stage and discharge measurement. We investigate under-ice measurement, ice condition periods frequency, and extreme values in contrast to rating curves. Moreover, employing an independent workflow, we demonstrate that 67% of existing records align with the rating curve and temporary shift concept, while the remaining 33% follow alternative discharge estimation methods (override). Examples from a handful of stations are provided for discharge estimation methods over time. Additionally, we illustrate the impact of override and temporary shifts on commonly assumed uncertainty models. Given the practices of override and temporary shifts within WSC, there is a need to explore innovative methods for discharge uncertainty estimation. We hope

our research helps in the critical challenge of estimating and communicating uncertainty in published discharge values.

L51-52. ‘River discharge or streamflow has significant importance for planning, impact and sustainability assessment’ – this is very generic and could apply to planning, impact and sustainability assessment of anything! This needs to be more specific to water resources.

Thank you for this comment. We will change this sentence to:

“River discharge or streamflow is the fundamental data upon which hydrology and water management depends.”

Aims L99-104 – I find the aims of “the study” quite confusing as it is not clear whether “the study” relates directly to this paper or to a wider project? Please revise this section and more clearly state what your core aims and objectives of this paper are.

We thank the reviewer for this comment. We will rewrite this part as:

“This study seeks to identify critical decisions on discharge estimation processes at the WSC. The study tries to address the following questions:

question 1 to 3.

The response and investigation of the aforementioned questions serve as the foundation for the overarching objectives of standardizing uncertainty quantification and communication within the quality assurance and management system of WSC.”

L152-154. What is “discharge activity”? The estimated discharge may then be used to correct what? These sentences are not clear.

The reason for using the “discharge activity” was the JSON key with the same name for discharge measurement in the WSC operational database. We have changed the discharge activity to stage and discharge measurement or simply measurement across the manuscript.

Table 1 and 2. I think you can place these in supplementary information. Many of these terms are described in the text already.

We thank the reviewer for this comment. We will consider moving the tables into the appendix.

Figures 3-5. These are very nice but could you combine these into one figure?

Respectfully, we hold a different perspective from the reviewer. Each of these figures serves a distinct purpose. For instance, Figure 3 delineates a static representation, shifting of rating curves that are often permanent. Meanwhile, Figure 5 illustrates temporary shifts in the rating curve, and Figure 4 demonstrates adjustments made to streamflow/discharge time series, addressing "override" or "temporary shift" scenarios. Initially, our attempt involved consolidating them into a single figure; however, this resulted in significant confusion due to the numerous panels and excessively lengthy captions required for explanation.

L316-317. It would be good to add a sentence here on why you are developing an independent Python workflow.

The reason for the workflow, as highlighted in the abstract, is to identify and label the period of the streamflow with various discharge estimating methods. We try to clarify this further in the text for the revised version.

L371-374. This sentence isn't clear and needs re-writing.

Thank you. We have reworked the sentence.

“Under ice observational points have much lower river discharge in comparison to open water flow for the same stage values and therefore are not used in the construction of rating curves, instead are used to adjust the estimated discharge using override values or temporary shifts during the ice condition (Figure 6c). “

“Under a winter ice cover, discharges are lower than during open water and measurements often do not fall on the stage-discharge curve. Instead, while ice is present, the observations are used to adjust the estimated discharges using overrides or temporary shifts (Figure 6c).

L405. The Environment Agency for England does not use this method. They use this method: [https://assets.publishing.service.gov.uk/government/uploads/system/uploads/attachment\\_data/file/290629/sw6-058-tr-e-e.pdf](https://assets.publishing.service.gov.uk/government/uploads/system/uploads/attachment_data/file/290629/sw6-058-tr-e-e.pdf)

Thank you very much. We will correct the reference about the methodology.

L411-418. The text on observed stage-discharge records is out of place here. It could be removed.

We thank the reviewer. We may move this to the earlier section of the explanation on the bullet points for under-ice conditions.

Figure-6 and 7 – you could move some of these examples to the supplementary information and combine these different examples of rating curves?

Referring to our overall response to the reviewer, we strongly believe in the significance of retaining these examples. They essentially illustrate the deterministic process involved in creating rating curves, a process that varies among hydrographers, offices, and even from year to year. Emphasizing the impact of ice in this context is crucial as it leads to a reduction in the available points for constructing the rating curve. Additionally, these figures are needed to link/explain Figures 16 and 17 of the manuscript.

Figure 10. I like this figure a lot and really interesting to see the regional differences.

We thank the reviewer for that. We're required to implement minor adjustments as per the request from the Copernicus office to enhance the figure's accessibility for individuals with color blindness.

L488-494. The description of the figure can be moved into the figure caption.

We appreciate the reviewer's input. While this explanation exists within the figure's caption, given that it initiates a sequence of four consecutive figures, we opt to explicitly introduce the panel to acquaint the reader and enhance the overall flow. This approach aims to facilitate smoother comprehension throughout the subsequent four figures, even though the caption covers similar details.

Also, we would like to mention that we will rearrange Figures 11 to 14. We start with the simplest case which is currently Figure 13 and move to a more complex case which is Figure 14.

L496. “significantly lower” – can you quantify this? How much lower?

We intended to convey substantial differences, several times in magnitude, between the estimated discharge by rating curve only and under ice discharge estimation by the WSC. To enhance clarity, we'll either eliminate "significantly" or rephrase the sentences for better communication.

Discussion and Conclusions – I would recommend splitting these and having a separate conclusions section where you turn your bullet points in L735-761 into a conclusions section.

We thank the reviewer for this suggestion. We do our best to split the section into two parts. Perhaps the section will be renamed as “Results and Discussions”, “Implications”, and “Conclusions” or “Results”, “Discussion”, and “Conclusions”.

Data availability. I appreciate that the streamflow data would need to be requested from the WSC but are there any other outputs from your extensive analysis that could be made available to users? For example, could you release the fraction of the discharge within 5% of reported discharge values for each station, or the number of days with a temporary shift for each station, or the fraction of time higher than the maximum observed stage? These outputs could be valuable for researchers conducting large-sample studies in Canada and could be used as a (admittedly crude) way of filtering out stations with more/less robust data.

The reviewer has raised a very valid point. As authors of this work, we've explored the prospect of disseminating the data and its analysis into the public domain. However, a significant hurdle lies in the legal implications associated with assessing data quality. WSC Canada strictly adheres to Standard Operating Procedures (SOPs) for estimating discharge values, ensuring these values are legally defensible. In this study, the Python workflow lacks the comprehensive details of SOPs that WSC follows (such as how temporary shift magnitude is estimated or how overrides are applied).

For future studies, we aim to assess a handful of stations among the entire network, comparing them with in-office information. This approach will provide a more comprehensive understanding of station practices and details specific to individual stations. Notably, the current study primarily focuses on overarching practices with illustrative examples that avoid excessive specificity.

Our Python workflow could be shared with other scientists, contingent upon obtaining the necessary permissions from WSC to utilize the data.

Once again, we would like to thank the reviewer for their constructive comments.

With kind regards,

Shervan Gharari, on behalf of co-authors, Paul Whitfield, Al Pietroniro, Jim Freer, Hongli Liu,  
Martyn P. Clark
